# Supplementary material
Source: publisher figshare collection journal article supplement (https://asha.figshare.com/articles/dataset/_/13203218)
Supplement: Supplementary file [file 1]

**Supplemental Table S5.** Additional single nucleotide polymorphisms (SNPs) with single-point logarithm of odds (LOD) scores > 2.0 in family 315 genome-wide.

| SNPs       | Chr | hg19 Position (Mbp) | Single-Point LOD score |
|------------|-----|---------------------|------------------------|
| rs2053372  | 2   | 24.91               | 2.03                   |
| rs935172   | 2   | 26.80               | 2.03                   |
| rs1386382  | 2   | 78.02               | 2.03                   |
| rs1545133  | 2   | 113.31              | 2.08                   |
| rs934748   | 2   | 113.36              | 2.08                   |
| rs1907642  | 3   | 111.74              | 2.21                   |
| rs7785205  | 7   | 0.93                | 2.08                   |
| rs2780701  | 9   | 93.57               | 2.38                   |
| rs984071   | 9   | 113.14              | 2.51                   |
| rs12450112 | 17  | 12.21               | 2.08                   |

*Note.* Chr = chromosome; Mbp = megabases.
