# Supplementary material
Source: publisher figshare collection journal article supplement (https://asha.figshare.com/articles/dataset/_/13203218)
Supplement: Supplementary file [file 1]

**Supplemental Table S1.** Previously reported chromosomal loci linked to related phenotypes showing single point logarithm of odds (LOD) scores > 1.2.

| Chr | Locus           | hg19 Position (Mbp) | rsIDs (Start-End)    | Family | Single-Point LOD score | Mode of Inheritance | Previously Linked/ Associated Phenotype | Reference                                                                                                                                                   |
|-----|-----------------|---------------------|----------------------|--------|------------------------|---------------------|-----------------------------------------|-------------------------------------------------------------------------------------------------------------------------------------------------------------|
| 1   | 1p36.11-p36.12  | 22.62-24.40         | rs6426746-rs4649175  | 315    | 1.45                   | Dominant            | RD, SLI                                 | (Grigorenko et al., 2001; Rabin et al., 1993; Rice et al., 2009; Tzenova et al., 2004)                                                                      |
|     | 1p36.12-p36.23  | 8.61-23.73          | rs1473420-rs3889814  | 387    | 1.80*                  | Dominant            |                                         |                                                                                                                                                             |
| 3   | 3p12.2-p13      | 71.52-83.38         | rs17108-rs349148     | 387    | 1.80*                  | Dominant            | RD, SLI<br>ASD, CAS                     | (Chen et al., 2017; Fisher & Francks, 2006; Hannula-Jouppi et al., 2005; Mountford et al., 2019; Nopola-Hemmi et al., 2001; Rice et al., 2009; Smith, 2007) |
|     | 3p12.2-q13.11   | 82.21-105.80        | rs17114-rs2035254    | 430    | 1.20*                  | Recessive           |                                         |                                                                                                                                                             |
| 4   | 4q35.1-q35.2    | 185.95-190.78       | rs1564986-rs1915852  | 387    | 1.80*                  | Recessive           | ASD                                     | (Ramanathan et al., 2004; Smith, 2007)                                                                                                                      |
|     | 4q34.3-q35.2    | 180.48-190.31       | rs2610998-rs1456351  | 430    | 1.20*                  | Recessive           |                                         |                                                                                                                                                             |
| 9   | 9q22.32-q33.1   | 98.44-117.82        | rs1335049-rs1060545  | 430    | 1.20*                  | Recessive           | CAS                                     | (Laffin et al., 2012)                                                                                                                                       |
| 12  | 12p12.3-q21.1   | 16.06-73.44         | rs10846247-rs1400142 | 387    | 1.80*                  | Recessive           | NWR test,<br>CAS                        | (Addis et al., 2010)                                                                                                                                        |
| 13  | 13q14.12-q14.3  | 45.63-52.54         | rs1747109-rs1801244  | 489    | 1.50                   | Recessive           | NWR test                                | (Truong et al., 2016)                                                                                                                                       |
| 18  | 18p11.23-p11.32 | 0.15-7.32           | rs545684-rs569629    | 387    | 1.80*                  | Recessive           | CAS, RD                                 | (Fisher et al., 2002)                                                                                                                                       |
|     | 18p11.21-p11.31 | 5.61-10.97          | rs948311-rs264234    | 430    | 1.20*                  | Recessive           |                                         |                                                                                                                                                             |

*Note.* Chr = chromosome; Mbp = megabases; RD = reading disorder; SLI = specific language impairment; ASD = autism spectrum disorders; CAS = childhood apraxia of speech; NWR = nonword repetition. \*LOD scores that reached the maximum estimated LOD (ELOD).

## References

- Addis, L., Friederici, A. D., Kotz, S. A., Sabisch, B., Barry, J., Richter, N., Ludwig, A. A., Rübsamen, R., Albert, F. W., Pääbo, S., Newbury, D. F., & Monaco, A. P. (2010). A locus for an auditory processing deficit and language impairment in an extended pedigree maps to 12p13.31-q14.3. *Genes, Brain and Behavior*, 9(6), 545-561. <https://doi.org/10.1111/j.1601-183X.2010.00583.x>
- Chen, X. S., Reader, R. H., Hoischen, A., Veltman, J. A., Simpson, N. H., Francks, C., Newbury, D. F., & Fisher, S. E. (2017). Next-generation DNA sequencing identifies novel gene variants and pathways involved in specific language impairment. *Scientific Reports*, 7, 1-17, Article 46105. <https://doi.org/10.1038/srep46105>
- Fisher, S. E., & Francks, C. (2006). Genes, cognition and dyslexia: Learning to read the genome. *Trends in Cognitive Sciences*, 10(6), 250-257. <https://doi.org/10.1016/j.tics.2006.04.003>
- Fisher, S. E., Francks, C., Marlow, A. J., MacPhie, I. L., Newbury, D. F., Cardon, L. R., Ishikawa-Brush, Y., Richardson, A. J., Talcott, J. B., Gayan, J., Olson, R. K., Pennington, B. F., Smith, S. D., DeFries, J. C., Stein, J. F., & Monaco, A. P. (2002). Independent genome-wide scans identify a chromosome 18 quantitative-trait locus influencing dyslexia. *Nat Genet*, 30(1), 86-91. <https://doi.org/10.1038/ng792>
- Grigorenko, E. L., Wood, F. B., Meyer, M. S., Pauls, J. E. D., Hart, L. A., & Pauls, D. L. (2001). Linkage studies suggest a possible locus for developmental dyslexia on chromosome 1p. *American Journal of Medical Genetics*, 105(1), 120-129. [https://doi.org/10.1002/1096-8628\(20010108\)105:1<120::AID-AJMG1075>3.0.CO;2-T](https://doi.org/10.1002/1096-8628(20010108)105:1<120::AID-AJMG1075>3.0.CO;2-T)
- Hannula-Jouppi, K., Kaminen-Ahola, N., Taipale, M., Eklund, R., Nopola-Hemmi, J., Kääriäinen, H., & Kere, J. (2005). The axon guidance receptor gene *ROBO1* is a candidate gene for developmental dyslexia. *PLoS Genetics*, 1(4), 0467-0474, Article e50. <https://doi.org/10.1371/journal.pgen.0010050>
- Laffin, J. J. S., Raca, G., Jackson, C. A., Strand, E. A., Jakielski, K. J., & Shriberg, L. D. (2012). Novel candidate genes and regions for childhood apraxia of speech identified by array comparative genomic hybridization. *Genetics in Medicine*, 14(11), 928-936. <https://doi.org/10.1038/gim.2012.72>
- Mountford, H. S., Villanueva, P., Fernández, M. A., De Barbieri, Z., Cazier, J. B., & Newbury, D. F. (2019). Candidate gene variant effects on language disorders in Robinson Crusoe Island. *Annals of Human Biology*, 46(2), 109-119. <https://doi.org/10.1080/03014460.2019.1622776>
- Nopola-Hemmi, J., Myllyluoma, B., Haltia, T., Taipale, M., Ollikainen, V., Ahonen, T., Voutilainen, A., Kere, J., & Widén, E. (2001). A dominant gene for developmental dyslexia on chromosome 3. *Journal of Medical Genetics*, 38(10), 658-664. <https://doi.org/10.1136/jmg.38.10.658>
- Rabin, M., Wen, X. L., Hepburn, M., Lubs, H. A., Feldman, E., & Duara, R. (1993). Suggestive linkage of developmental dyslexia to chromosome 1p34-p36. *The Lancet*, 342(8864), 178. [https://doi.org/10.1016/0140-6736\(93\)91384-X](https://doi.org/10.1016/0140-6736(93)91384-X)
- Ramanathan, S., Woodroffe, A., Flodman, P. L., Mays, L. Z., Hanouni, M., Modahl, C. B., Steinberg-Epstein, R., Bocian, M. E., Spence, M. A., & Smith, M. (2004). A case of autism with an interstitial deletion on 4q leading to hemizygosity for genes encoding for glutamine and glycine neurotransmitter receptor sub-units (*AMPA 2*, *GLRA3*, *GLRB*) and neuropeptide receptors *NPY1R*, *NPY5R*. *BMC Medical Genetics*, 5(1), Article 10. <https://doi.org/10.1186/1471-2350-5-10>
- Rice, M. L., Smith, S. D., & Gayán, J. (2009). Convergent genetic linkage and associations to language, speech and reading measures in families of probands with specific language impairment. *Journal of Neurodevelopmental Disorders*, 1(4), 264-282. <https://doi.org/10.1007/s11689-009-9031-x>
- Smith, S. D. (2007). Genes, language development, and language disorders. *Mental Retardation and Developmental Disabilities Research Reviews*, 13(1), 96-105. <https://doi.org/10.1002/mrdd.20135>
- Truong, D. T., Shriberg, L. D., Smith, S. D., Chapman, K. L., Scheer-Cohen, A. R., DeMille, M. M. C., Adams, A. K., Nato, A. Q., Wijsman, E. M., Eicher, J. D., & Gruen, J. R. (2016). Multipoint genome-wide linkage scan for nonword repetition in a multigenerational family further supports chromosome 13q as a locus for verbal trait disorders. *Human Genetics*, 135(12), 1329-1341. <https://doi.org/10.1007/s00439-016-1717-z>
- Tzenova, J., Kaplan, B. J., Petryshen, T. L., & Field, L. L. (2004). Confirmation of a dyslexia susceptibility locus on chromosome 1p34-p36 in a set of 100 Canadian families. *American Journal of Medical Genetics Part B: Neuropsychiatric Genetics*, 127(1), 117-124. <https://doi.org/10.1002/ajmg.b.20139>
