# Supplementary material
Source: publisher figshare collection journal article supplement (https://asha.figshare.com/articles/dataset/_/13203218)
Supplement: Supplementary file [file 1]

**Supplemental Table S2.** Genes in the suggestive linkage region chr4:154,887,604-179,989,221 (chr4q31.3-q34.3).

|              |              |              |              |              |
|--------------|--------------|--------------|--------------|--------------|
| DCHS2        | RXFP1        | TRIM61       | LINC02275    | CEP44        |
| PLRG1        | C4orf46      | FAM218A      | MFAP3L       | MIR4276      |
| FGB          | ETFDH        | TRIM60       | AADAT        | HPGD         |
| FGA          | PPID         | TMEM192      | LINC01612    | GLRA3        |
| FGG          | FNIP2        | KLHL2        | LINC02382    | LOC101928551 |
| LRAT         | C4orf45      | GK3P         | LINC02431    | ADAM29       |
| RBM46        | RAPGEF2      | MSMO1        | MIR6082      | GPM6A        |
| NPY2R        | MIR3688-1    | CPE          | LINC02174    | LOC101928590 |
| MAP9         | MIR3688-2    | MIR578       | LOC441052    | WDR17        |
| LOC102724776 | LINC02233    | LINC01179    | GALNTL6      | SPATA4       |
| GUCY1A1      | FSTL5        | LOC101928131 | GALNTL6-AS1  | ASB5         |
| GUCY1B1      | LOC101928052 | TLL1         | LOC101930370 | SPCS3        |
| ASIC5        | MIR4454      | SPOCK3       | GALNT7       | VEGFC        |
| TDO2         | NAF1         | ANXA10       | MIR548T      | LINC02509    |
| CTSO         | NPY1R        | DDX60        | HMGB2        | NEIL3        |
| PDGFC        | NPY5R        | DDX60L       | SAP30        | AGA          |
| GLRB         | TKTL2        | PALLD        | SCRG1        | LINC01098    |
| GRIA2        | TMA16        | CBR4         | HAND2        | LINC01099    |
| LINC02433    | MARCHF1      | SH3RF1       | HAND2-AS1    |              |
| GASK1B       | ANP32C       | NEK1         | LINC02269    |              |
| FAM198B-AS1  | SMIM31       | CLCN3        | LINC02268    |              |
| TMEM144      | APELA        | HPF1         | FBXO8        |              |
