# Supplementary material
Source: publisher figshare collection journal article supplement (https://asha.figshare.com/articles/dataset/_/13203218)
Supplement: Supplementary file [file 1]

**Supplemental Table S3.** Genes in the suggestive linkage region chr15:68,679,181-83,215,251 (chr15q23-q25.2).

|             |            |              |              |              |
|-------------|------------|--------------|--------------|--------------|
| ITGA11      | ARIH1      | CYP1A2       | MIR3713      | ST20-MTHFS   |
| CORO2B      | MIR630     | CSK          | RCN2         | ST20         |
| ANP32A      | LINC02259  | MIR4513      | PSTPIP1      | ST20-AS1     |
| MIR4312     | GOLGA6B    | LMAN1L       | TSPAN3       | BCL2A1       |
| ANP32A-IT1  | HIGD2B     | CPLX3        | PEAK1        | ZFAND6       |
| NOX5        | BBS4       | ULK3         | LINC00597    | FAH          |
| SPESP1      | ADPGK      | MIR6882      | HMG20A       | CTXND1       |
| EWSAT1      | ADPGK-AS1  | SCAMP2       | LOC101929457 | LINC00927    |
| GLCE        | NEO1       | MPI          | LINGO1       | ARNT2        |
| PAQR5       | MIR12135   | FAM219B      | LINGO1-AS1   | LOC101929586 |
| LOC145694   | HCN4       | COX5A        | LINGO1-AS2   | MIR5572      |
| KIF23       | REC114     | RPP25        | LOC645752    | ABHD17C      |
| RPLP1       | NPTN       | SCAMP5       | COMMD4P1     | CEMIP        |
| DRAIC       | NPTN-IT1   | PPCDC        | LOC91450     | MIR549A      |
| PCAT29      | CD276      | C15orf39     | TBC1D2B      | MESD         |
| LINC00593   | INSYN1     | LOC105376731 | SH2D7        | MIR4514      |
| TLE3        | INSYN1-AS1 | GOLGA6C      | CIB2         | TLNRD1       |
| MIR629      | TBC1D21    | GOLGA6D      | IDH3A        | CFAP161      |
| LINC02205   | LOXL1-AS1  | COMMD4       | ACSBG1       | IL16         |
| LINC02204   | LOXL1      | NEIL1        | DNAJA4       | STARD5       |
| SALRNA3     | STOML1     | MIR631       | WDR61        | TMC3-AS1     |
| SALRNA2     | PML        | MAN2C1       | CRABP1       | TMC3         |
| UACA        | GOLGA6A    | SIN3A        | IREB2        | MEX3B        |
| LARP6       | COMMD4P2   | PTPN9        | HYKK         | LINC01583    |
| LRRC49      | LOC283731  | SNUPN        | PSMA4        | EFL1         |
| THAP10      | ISLR2      | IMP3         | CHRNA5       | SAXO2        |
| THSD4       | ISLR       | SNX33        | CHRNA3       | ADAMTS7P1    |
| THSD4-AS1   | STRA6      | CSPG4        | CHRNA4       | GOLGA6L10    |
| THSD4-AS2   | CCDC33     | ODF3L1       | LOC646938    | UBE2Q2P2     |
| NR2E3       | CYP11A1    | DNM1P35      | ADAMTS7      | GOLGA6L9     |
| MYO9A       | PPIAP46    | MIR4313      | MORF4L1      | GOLGA2P10    |
| SENP8       | LINC02255  | UBE2Q2       | CTSH         | LOC727751    |
| GRAMD2A     | SEMA7A     | FBXO22       | RASGRF1      | GOLGA6L17P   |
| PKM         | MIR6881    | NRG4         | LOC100129540 | RPS17        |
| PARP6       | UBL7       | TMEM266      | ANKRD34C-AS1 | LOC102724034 |
| CELF6       | UBL7-AS1   | LOC101929439 | MIR184       | CPEB1        |
| HEXA        | ARID3B     | ETFA         | ANKRD34C     |              |
| HEXA-AS1    | CLK3       | TYRO3P       | TMED3        |              |
| TMEM202     | EDC3       | ISL2         | MINAR1       |              |
| TMEM202-AS1 | CYP1A1     | SCAPER       | MTHFS        |              |
