# Supplementary material
Source: publisher figshare collection journal article supplement (https://asha.figshare.com/articles/dataset/_/13203218)
Supplement: Supplementary file [file 1]

**Supplemental Table S4.** Genes in the linkage region chr14:20,825,965-37,059,525 (chr14q11.2-q13.3).

|              |               |              |              |              |
|--------------|---------------|--------------|--------------|--------------|
| PARP2        | OR10G3        | NGDN         | SDR39U1      | EGLN3        |
| TEP1         | OR10G2        | THTPA        | LOC101927045 | SPTSSA       |
| KLHL33       | OR4E2         | ZFHX2        | CMA1         | EAPP         |
| OSGEP        | OR4E1         | AP1G2        | CTSG         | RNVU1-18     |
| APEX1        | LOC105370401  | LOC102724814 | GZMH         | RNU1-3       |
| PIP4P1       | LINC02332     | JPH4         | GZMB         | RNU1-4       |
| PNP          | DAD1          | DHRS2        | STXBP6       | RNU1-2       |
| RNASE10      | ABHD4         | DHRS4-AS1    | NOVA1        | RNU1-1       |
| RNASE9       | OR6J1         | DHRS4        | LINC02588    | SNX6         |
| RNASE11      | OXA1L         | DHRS4L2      | LINC02294    | CFL2         |
| LOC254028    | SLC7A7        | DHRS4L1      | LINC02293    | BAZ1A        |
| RNASE12      | MRPL52        | CARMIL3      | MIR4307HG    | LOC112268124 |
| OR6S1        | MMP14         | CPNE6        | MIR4307      | SRP54-AS1    |
| ANG          | LRP10         | NRL          | LOC728755    | IGBP1P1      |
| RNASE4       | REM2          | PCK2         | LINC00645    | SRP54        |
| EDDM3A       | RBM23         | DCAF11       | MIR3171      | FAM177A1     |
| EDDM3B       | PRMT5-AS1     | FITM1        | FOXG1-AS1    | LOC101927178 |
| RNASE6       | PRMT5         | PSME1        | FOXG1        | PPP2R3C      |
| RNASE1       | LOC101926933  | EMC9         | LINC01551    | PRORP        |
| RNASE3       | HAUS4         | PSME2        | LINC02282    | PSMA6        |
| ECRP         | MIR4707       | MIR7703      | PRKD1        | NFKBIA       |
| RNASE2       | AJUBA         | RNF31        | G2E3-AS1     | INSM2        |
| METTL17      | C14orf93      | IRF9         | G2E3         | RALGAPA1     |
| LOC101929718 | PSMB5         | REC8         | SCFD1        | SNORA101B    |
| SLC39A2      | PSMB11        | IPO4         | COCH         | BRMS1L       |
| NDRG2        | CDH24         | TM9SF1       | LOC100506071 | LINC00609    |
| MIR6717      | ACIN1         | TSSK4        | STRN3        | PTCSC3       |
| TPPP2        | C14orf119     | CHMP4A       | MIR624       | MBIP         |
| RNASE13      | LMLN2         | MDP1         | AP4S1        | SFTA3        |
| RNASE7       | CEBPE         | NEDD8-MDP1   | HECTD1       | NKX2-1       |
| RNASE8       | SLC7A8        | NEDD8        | HEATR5A      | NKX2-1-AS1   |
| ARHGEF40     | RNF212B       | GMPR2        | LOC101927124 | NKX2-8       |
| ZNF219       | HOMEZ         | TINF2        | DTD2         |              |
| TMEM253      | PPP1R3E       | TGM1         | GPR33        |              |
| OR5AU1       | BCL2L2-PABPN1 | RABGGTA      | NUBPL        |              |
| LINC00641    | BCL2L2        | DHRS1        | LINC02313    |              |
| HNRNPC       | PABPN1        | NOP9         | ARHGAP5-AS1  |              |
| RPGRIP1      | SLC22A17      | CIDEB        | ARHGAP5      |              |
| SUPT16H      | EFS           | LTB4R2       | RNU6-1       |              |
| CHD8         | IL25          | LTB4R        | RNU6-9       |              |
| SNORD9       | CMTM5         | ADCY4        | RNU6-2       |              |
| SNORD8       | MYH6          | RIPK3        | RNU6-7       |              |
| RAB2B        | MIR208A       | NFATC4       | RNU6-8       |              |
| TOX4         | MYH7          | NYNRIN       | AKAP6        |              |
| METTL3       | MHRT          | CBLN3        | NPAS3        |              |
| SALL2        | MIR208B       | KHNYN        | SNORA89      |              |
